# Supplementary material for: Revealing New Landscape of Turbot (Scophthalmus maximus) Spleen Infected with Aeromonas salmonicida through Immune Related circRNA-miRNA-mRNA Axis
Source: MDPI journal article supplement (doi:10.3390/biology10070626), 2021-07-06
Supplement: s1 [file s1]

Supplementary Table 1 Primers used in this study.

| Primer name             | Nucleotide sequence (5'-3') | Purpose |
|-------------------------|-----------------------------|---------|
| SM novel_circ_0000498 F | AGAAAGAAGGCGAAGTGGACTC      | qRT-PCR |
| SM novel_circ_0000498 R | TTGGAGGGAGACTCTGCGGTT       | qRT-PCR |
| SM novel_circ_0004184 F | TCTCTGACTACAAGCACCCT        | qRT-PCR |
| SM novel_circ_0004184 R | GATATGGCTTGAACACGATGGT      | qRT-PCR |
| SM novel_circ_0002683 F | GGGTGCACTGTTGCATATACTT      | qRT-PCR |
| SM novel_circ_0002683 R | CGGCTCACCTTGGATTTGAAC       | qRT-PCR |
| SM novel_circ_0003361 F | GACTCCAGTGGCTGCTCTT         | qRT-PCR |
| SM novel_circ_0003361 R | ACCAGAGCGATGAAGGTCC         | qRT-PCR |
| SM dre-miR-223          | TGTCAGTTTGTCAAATACCCC       | qRT-PCR |
| SM dre-miR-200a-3p      | TAACACTGTCTGGTAACGATG       | qRT-PCR |
| SM dre-miR-200b-3p      | TAATACTGCCTGGTAATGATGA      | qRT-PCR |
| SM dre-miR-122          | TGGAGTGTGACAATGGTGT         | qRT-PCR |
| SM gene14346 F          | CAGCCAGATCCAGCACATCAC       | qRT-PCR |
| SM gene14346 R          | AGGCGCTGAACTGAAACGAGT       | qRT-PCR |
| SM gene658 F            | GTTGCAGTGACACTCGTGCTC       | qRT-PCR |
| SM gene658 R            | ACGGTTCCATTGACGTCTCTT       | qRT-PCR |
| SM gene9492 F           | ATGGCGACTTCTTCCCAATCT       | qRT-PCR |
| SM gene9492 R           | GGCCTCTGTGGTCAGGTTG         | qRT-PCR |
| SM gene1381 F           | CTCATCAACACCTGTTACACCT      | qRT-PCR |
| SM gene1381 R           | TGCAAAGGCACAAATGATCATCAG    | qRT-PCR |
| 18S qF                  | TGTGGGTTTCTCTCTCTG          | qRT-PCR |
| 18S qR                  | ATTCTTGGCAAATGCTTTC         | qRT-PCR |
| U6 F                    | GCTTCGGCAGCACATATACTAAAAT   | qRT-PCR |
| U6 R                    | CGCTTCACGAATTTGCGTGTCTCAT   | qRT-PCR |
